# Supplementary material for: Association between Nonfood Pre- or Probiotic Use and Cognitive Function: Results from NHANES 2011–2014
Source: MDPI journal article supplement (doi:10.3390/nu15153408), 2023-07-31
Supplement: s1 [file s1]

**Table S1.** The classification of probiotics and prebiotics.

| Prebiotic                                                                                                                           | Probiotic                                                                                                                                                                                                                                                                                                                                                                                                                                                                                                                |
|-------------------------------------------------------------------------------------------------------------------------------------|--------------------------------------------------------------------------------------------------------------------------------------------------------------------------------------------------------------------------------------------------------------------------------------------------------------------------------------------------------------------------------------------------------------------------------------------------------------------------------------------------------------------------|
| glucan, gum, arabic, inulin, oligofruc, oligosac, prebiotic, pre-biotic, resistant starch, chicor, psyllium, resveratrol, lactulose | acidophilus, animalis, bacillus, bacilli, bifidobacteri, bifidum, boulardii, breve, brevis, bulgaricus, casei, cerevisiae, coagulans, delbrueckii, enterococcus, faecalis, faecium, fermentum, gasseri, helveticus, infantis, lactis, lactic acid bacteria, lactobacill, lactococcus, leuconostoc, licheniformis, longum, mesenteric, paracasei, pediococcus, plantarum, probiotic, pro-biotic, pro biotic, propionibacteri, reuteri, rhamnosus, saccharomyc, salivarius, streptococcus, subtilis, thermophilus, E. coli |

**Table S2.** Charateristics of participants who did not use nonfood pre- or probiotic.

| Characteristic        | Female             | Male               | P        |
|-----------------------|--------------------|--------------------|----------|
| Age                   | 69.56(69.06,70.05) | 69.09(68.42,69.76) | 0.23     |
| Age_subgroup          |                    |                    | 0.24     |
| 60-69                 | 484(53.69)         | 356(56.72)         |          |
| >=70                  | 452(46.31)         | 361(43.28)         |          |
| Ethnicity             |                    |                    | 0.24     |
| White                 | 516(82.40)         | 389(84.25)         |          |
| Black                 | 187(7.38)          | 147(5.48)          |          |
| Mexican               | 64(2.62)           | 58(2.72)           |          |
| Other                 | 169(7.60)          | 123(7.55)          |          |
| Education             |                    |                    | 0.73     |
| Less than high school | 184(12.70)         | 149(12.10)         |          |
| High school or higher | 752(87.30)         | 568(87.90)         |          |
| PIR                   |                    |                    | < 0.0001 |
| <1.3                  | 275(18.78)         | 170(11.35)         |          |
| 1.3-3.5               | 371(39.76)         | 254(33.86)         |          |
| >3.5                  | 290(41.46)         | 293(54.78)         |          |
| BMI                   |                    |                    | 0.04     |
| <25                   | 262(29.00)         | 185(22.20)         |          |
| 25-29.9               | 289(32.76)         | 291(41.15)         |          |
| >=30                  | 385(38.24)         | 241(36.64)         |          |
| Smoke                 |                    |                    | < 0.0001 |
| Never                 | 593(59.76)         | 260(40.02)         |          |
| Former                | 261(31.74)         | 363(49.29)         |          |
| Current               | 82(8.50)           | 94(10.69)          |          |
| Alcohol               |                    |                    | < 0.001  |
| Current               | 484(61.36)         | 445(69.15)         |          |
| Former                | 242(21.42)         | 218(23.62)         |          |
| Never                 | 210(17.22)         | 54(7.23)           |          |
| Hypertension          |                    |                    | 0.86     |
| No                    | 251(32.01)         | 218(32.45)         |          |
| Yes                   | 685(67.99)         | 499(67.55)         |          |
| Stroke                |                    |                    | 0.98     |
| No                    | 865(93.37)         | 670(93.33)         |          |
| Yes                   | 71(6.63)           | 47(6.67)           |          |

|        |                 |                   |          |
|--------|-----------------|-------------------|----------|
| DM     |                 |                   | 0.02     |
| No     | 580(67.76)      | 391(59.44)        |          |
| Yes    | 356(32.24)      | 326(40.56)        |          |
| CVD    |                 |                   | 0.002    |
| No     | 751(82.18)      | 527(71.97)        |          |
| Yes    | 185(17.82)      | 190(28.03)        |          |
| z.CERD | 0.26(0.16,0.35) | -0.01(-0.14,0.11) | < 0.0001 |
| z.AFT  | 0.23(0.14,0.33) | 0.31(0.20,0.43)   | 0.24     |
| z.DSST | 0.42(0.34,0.50) | 0.24(0.16,0.31)   | < 0.001  |
| sum.z  | 0.91(0.69,1.13) | 0.54(0.29,0.79)   | 0.004    |

PIR: ratio of family income to poverty; BMI: body mass index; DM: diabetes mellitus; CVD: cardiovascular disease.

**Table S3.** Definition various variables for PSM.

| Variable     | Variable definitions                            |
|--------------|-------------------------------------------------|
| Treated      | 0=None,1=Prebiotic or probiotic                 |
| Age          | Continuous variable                             |
| Ethnicity    | 0=white,1=black,2=mexican,3=other               |
| PIR          | 0="<1.3", 1="1.3-3.5", 2=">3.5"                 |
| Education    | 0=Less than high school,1=High school or higher |
| BMI          | 0="<25" 1="25-29.9", 2=">30"                    |
| Smoke        | 0=Never,1=Former,2=Current                      |
| Alcohol      | 0=Never,1=Former,2=Current                      |
| Hypertension | 0=No,1=Yes                                      |
| Stroke       | 0=No,1=Yes                                      |
| CVD          | 0=No,1=Yes                                      |
| DM           | 0=No,1=Yes                                      |

PIR: ratio of family income to poverty; BMI: body mass index; CVD: cardiovascular disease; DM: diabetes mellitus.
